# Supplementary material for: Using Cryo-ET to distinguish platelets during pre-acute myeloid leukemia from steady state hematopoiesis
Source: PubMed Central journal article supplement (PMC8776871; doi:10.1038/s42003-022-03009-4), 2022-01-20
Supplement: 42003_2022_3009_MOESM3_ESM.pdf [file 42003_2022_3009_MOESM3_ESM.pdf]

## Description of Additional Supplementary Files

**File name:** Supplementary Movie 1

**Description:** Representative healthy platelet tomogram. Slicewise view scrolling through the tomogram. Organelles are annotated.

**File name:** Supplementary Movie 2

**Description:** Representative AML platelet tomogram. Slicewise view scrolling through the tomogram. Organelles are annotated.

**File name:** Supplementary Movie 3

**Description:** Representative pre-AML platelet tomogram. Slicewise view scrolling through the tomogram. Organelles are annotated.

**File name:** Supplementary Data 1

**Description:** Average platelet and mitochondria areas in un-irradiated WT, Pre-AML, AML, and controls.

**File name:** Supplementary Data 2

**Description:** Circularity measurements of abnormal and normal mitochondria.

**File name:** Supplementary Data 3

**Description:** Source data for Fig. 3d.
